# Supplementary material for: Rapid molecular assay for the evaluation of clove essential oil antifungal activity against wheat common bunt
Source: PubMed Central journal article supplement (PMC10277744; doi:10.3389/fpls.2023.1130793), 2023-06-05
Supplement: DataSheet_2.pdf [file DataSheet_2.pdf]

Supplementary\_table 2

| Sowing | AVG-T1 | AVG-T2 | AVG-T3 | LT1 | LT2 | LT3 | HT1 | HT2 | HT3 | MA  | PA   | Presence | T50 |
|--------|--------|--------|--------|-----|-----|-----|-----|-----|-----|-----|------|----------|-----|
| S01    | 0      | 30     | 10     | 2   | 36  | 2   | 0   | 5   | 35  | 0   | 0    | N        | 4   |
| S02    | 0      | 37     | 3      | 8   | 32  | 0   | 0   | 8   | 32  | 0   | 0    | N        | 7   |
| S03    | 4      | 35     | 1      | 22  | 18  | 0   | 0   | 13  | 27  | 0   | 0    | N        | 10  |
| S04    | 11     | 28     | 1      | 31  | 9   | 0   | 0   | 17  | 23  | 82  | 90   | Y        | 20  |
| S05    | 8      | 32     | 0      | 27  | 13  | 0   | 0   | 14  | 26  | 22  | 2.7  | Y        | 20  |
| S06    | 0      | 39     | 1      | 28  | 12  | 0   | 0   | 22  | 18  | 20  | 53   | Y        | 9   |
| S07    | 6      | 34     | 0      | 33  | 7   | 0   | 0   | 26  | 14  | 0   | 8.6  | Y        | 16  |
| S08    | 7      | 33     | 0      | 28  | 12  | 0   | 0   | 29  | 11  | 48  | 41.4 | Y        | 21  |
| S09    | 10     | 30     | 0      | 25  | 15  | 0   | 0   | 22  | 18  | 2.7 | 7.5  | Y        | 18  |
| S10    | 4      | 36     | 0      | 25  | 15  | 0   | 0   | 11  | 29  | 4.9 | 0    | Y        | 11  |

AVG T1 Days with an average temperature between -5 and 5 °C

AVG T2 Days with an average temperature between 5 and 15 °C

AVG T3 Days with an average temperature between 15 and 25 °C

LT1 Days with a lower temperature between -5 and 5 °C

LT2 Days with a lower temperature between 5 and 15 °C

LT3 Days with a lower temperature between 15 and 25 °C

HT1 Days with a higher temperature between -5 and 5 °C

HT2 Days with a higher temperature between 5 and 15 °C

HT3 Days with a higher temperature between 15 and 25 °C

MA Molecular analysis percentages

PA Phenotypic analysis percentages

Presence Presence of infection in MA or PA (Y: presence; N: absence)

T50 Median germination time
